# Supplementary material
Source: publisher site journal article supplement (https://www.dovepress.com/article/487503)
Supplement: Supplementary file 1 [file get_supplementary_file.php]

**Supplementary Table 1. Baseline characteristics of naive patients and non-naive patients.**

| Characteristics | naive patients | non-naive patients | *P* value |
| --- | --- | --- | --- |
| **Gender** |  |  |  |
| Male | 9 | 67 | 0.546 |
| Female | 16 | 91 |  |
| **Age** |  |  |  |
| ＜40 | 7 | 57 | 0.318 |
| 40–60 | 13 | 85 |  |
| ＞60 | 5 | 16 |  |
| **Endoscopic and pathological finding** |  |  |  |
| Peptic ulcer | 2 | 27 | 0.324 |
| Pre-neoplastic lesions | 10 | 51 |  |

**Supplementary Table 2. Antibiotic combination of *H. pylori* eradication.**

| **Antibiotic regimen** | Cases (n = 183) | Percentage |
| --- | --- | --- |
| Amoxicillin plus furazolidone | 51 | 27.9% |
| Amoxicillin plus clarithromycin | 16 | 8.7% |
| Amoxicillin plus levofloxacin | 16 | 8.7% |
| Amoxicillin plus metronidazole | 1 | 0.5% |
| Tetracycline plus levofloxacin | 10 | 5.5% |
| Tetracycline plus furazolidone | 38 | 20.8% |
| Tetracycline plus amoxicillin | 37 | 20.2% |
| Tetracycline plus metronidazole | 3 | 1.6% |
| Tetracycline plus clarithromycin | 1 | 0.5% |
| Clarithromycin plus furazolidone | 4 | 2.2% |
| Levofloxacin plus furazolidone | 6 | 3.3% |
